# Supplementary material for: A dCas9/sgRNA complex-mediated competitive assay for accurate and sensitive Pseudomonas aeruginosa analysis
Source: Royal Society of Chemistry journal article supplement (doi:10.1039/d4ay02194k), 2025-01-01
Supplement: d4ay02194k1.pdf [file d4ay02194k1.pdf]

## Supporting information

### Supplemented experimental section

#### 1. Bacterial culture and DNA genome extraction

Each of the bacteria strains was streaked onto LB plates from freezer stocks held at –80 °C and grown at 37 °C for 16 h to form single colonies. Single colonies were picked and grown in tubes containing 2 mL of liquid LB medium and were shaken for 16 h at 37 °C (180 rpm). Kit-based method and heat-treated method were employed to obtain bacterial genomic DNA. As to the kit-based method, genomic DNA was extracted following the instruction of bacterial DNA extraction Kit (No. DP302, Tiangen, China). Bacterial cells were harvested by centrifugation (13400g, 1 min) of 1 mL of cell suspension. The purified DNA was eluted twice with 50 µL deionized water. The heat-treated method was employed for crude DNA extractions from clinical samples. All swabs were first blistered into respective sterilized EP tube and gently shaken. The instrument used for heating was a metal bath, the instrument was preheated to 100 °C, then 300 µL of nucleic-free water that partially dissolved the swab was immediately inserted into metal bath. After 8 min, the lysate containing crude genomic DNA was collected by centrifugation at 11,000g for 1 min and supernatant was used as a template for following experiments.

#### 2. Preparation of the dCas9/sgRNA@MBs

To covalently attach an oligonucleotide (linker sequence) to the dCas9 protein, 10 µL of the linker sequence (10 µM) with a 5' O<sub>6</sub>-benzylguanine (BG) group was incubated with the 2 µL of dCas9 protein (1 mg) at 37 °C for 60 min. The dCas9/linker complex were added to 20 µL solution containing streptavidin-coated magnetic beads (MBs) (0.4 mg). After 30 min incubation at room temperature, the solution was treated by the magnet for 10 min to enrich the dCas9 @MBs. The precipitate was washed by the PBS buffer solution for 3 times to remove the free dCas9/linker complex. We then assembled 2 µL of sgRNA (10 µM) and dCas9@MBs in a 1× NEBuffer 3.1 Reaction Buffer (100 mM NaCl, 50 mM Tris-HCl, 10 mM MgCl<sub>2</sub>, 100 µg/mL of BSA, pH 7.9 at 25 °C) for 30 min to construct the dCas9/sgRNA@MBs.

#### 3. Assembly of the sensing probe (SP)

20 µL of the synthesized SP probe (10 µM) in linear state was heated to 90 °C for 10 min. The mixture was then cooled to room temperature (1 °C /min) to assemble the SP. The obtained SP solution was then diluted to 500 nM before applying in the proposed method for *P. aeruginosa* detection.

**Table S1.** Oligonucleotide sequences used in this work.

| Name  | Sequences (5' to 3')                                                                                        |
|-------|-------------------------------------------------------------------------------------------------------------|
| sgRNA | UAA UUU CUA CUA AGU GUA GAU AGC GUA GGA CAG CUU<br>GCC AU                                                   |
| SP    | AACT ATA CAA CCT ACT ACC TCA ATA TTA AAT GGC AAG CTG<br>TCC TAC GCT TTT TTT TTT AGC GTA GGA CAG CTT GCC ATT |

|      |                                                                                                                           |
|------|---------------------------------------------------------------------------------------------------------------------------|
| FP   | TAA<br>CG ACC TTC CAC CGA GCT AGA TCC CTG GAC GAC TTG AAA<br>AAC TAT ACA ACC TAC TAC CTC A TTT CAA GTC GTC CAG TTG<br>AAA |
| “1*” | TGA GGT AGT AGG TTG TAT AGT T                                                                                             |

**Table S2.** Bacterial strains used in this study.

| Bacteria species                                          | Strain                                |
|-----------------------------------------------------------|---------------------------------------|
| <i>Listeria monocytogenes</i> ( <i>L. monocytogenes</i> ) | ATCC 19606                            |
| <i>Klebsiella pneumonia</i> ( <i>K. pneumoniae</i> )      | clinical strain identified by our lab |
| <i>Escherichia coli</i> ( <i>E. coli</i> )                | ATCC 19433                            |
| <i>Staphylococcus aureus</i> ( <i>S. aureus</i> )         | ATCC 25923                            |
| <i>Pseudomonas aeruginosa</i>                             | PAO1                                  |

**Table S3.** Comparison of the method with traditional methods.

| Title                    | Mechanism                                          | Specificity                                                               | Cost | Thermal cycles | Equipment      | Primer design           |
|--------------------------|----------------------------------------------------|---------------------------------------------------------------------------|------|----------------|----------------|-------------------------|
| The method               | dCas9/sgRNA+ self-priming mediated chain extension | High                                                                      | Low  | No             | No             | Simply change the sgRNA |
| RT-PCR                   | Chain extension                                    | False positive results from non-specific hybridization and primer binding | High | Yes            | PCR instrument | Complicated             |
| Colony culture and count | Dilute the bacteria to a single colony             | Low (morphological observation)                                           | Low  | No             | No             | No primer design        |

RT-PCR, Reverse Transcription-Polymerase Chain Reaction.

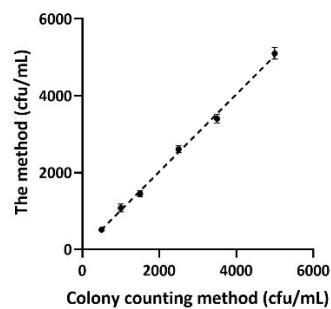

**Figure S1.** The correlation between the calculated *P. aeruginosa* concentrations by the method and the standard colony counting method.
